# Supplementary material for: Toxic Determination of Cry11 Mutated Proteins Obtained Using Rational Design and Its Computational Analysis
Source: MDPI journal article supplement (doi:10.3390/ijms24109079), 2023-05-22
Supplement: s1 [file s1]

## Article

# Toxic determination of Cry11 mutated proteins obtained using rational design and its computational analysis

Suarez-Barrera M.O.<sup>1,3</sup>, Herrera-Pineda Diego<sup>1</sup>, Rondón-Villarreal P<sup>1</sup>, Pinzón-Reyes EH<sup>1,4</sup>, Ochoa Rodrigo<sup>5</sup>, Visser L<sup>1</sup>, and Rueda N.J.\*

<sup>1</sup> Facultad de Ciencias Médicas y de la Salud, Instituto de Investigación Masira, Universidad de Santander

<sup>2</sup> Department of Pathology and Medical Biology, University of Groningen, University Medical Center Groningen, Groningen, The Netherlands

<sup>3</sup> Max Planck Tandem Group in Nanobioengineering, Institute of Chemistry, Faculty of Natural and Exact sciences, University of Antioquia.

<sup>4</sup> Centro de Bioinformática, Simulación y Modelado (CBSM), School of Bioinformatic, Universidad de Talca, Talca, Chile

<sup>5</sup> Biophysics of Tropical Diseases, Max Planck Tandem Group, University of Antioquia, 050010 Medellin, Colombia

\* Correspondence: Juliana.forero@udes.edu.co

## Supplementary materials

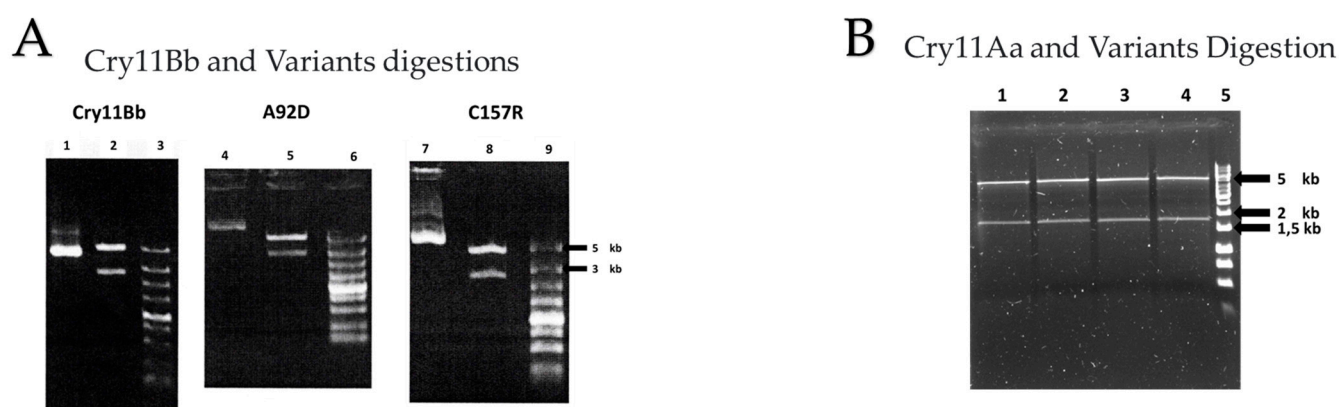

**Figure S1.** Restriction enzyme assay HindIII/ SacI for every native and variant gene obtained. 1) 553; 2) 556; 3) 553-556; 4) Cry11Aa; 5) Weight marker.

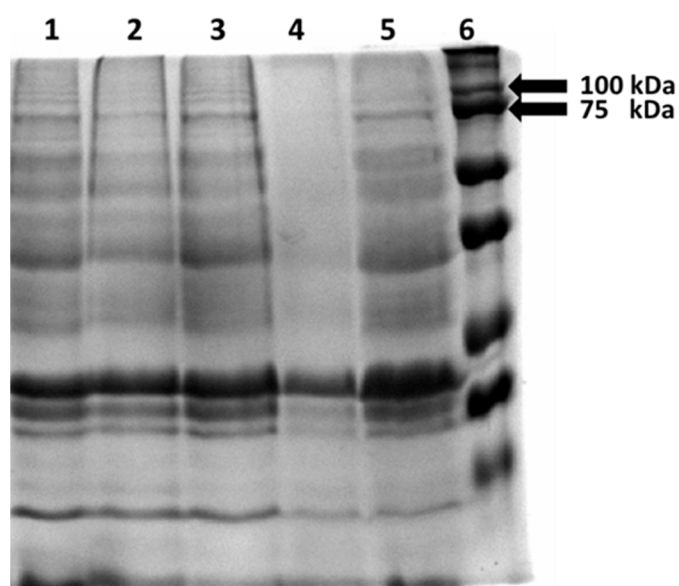

**Figure S2. A.** SDS-PAGE Cry11Aa – 72 kDa. Lane 1. Variant 553; Lane 2. variant 556; Lane 3. Double mutant 553-556; Lane 4. Negative Control BMB171; Lane 5. Positive Control Cry11Aa; Lane 6. Weight marker.

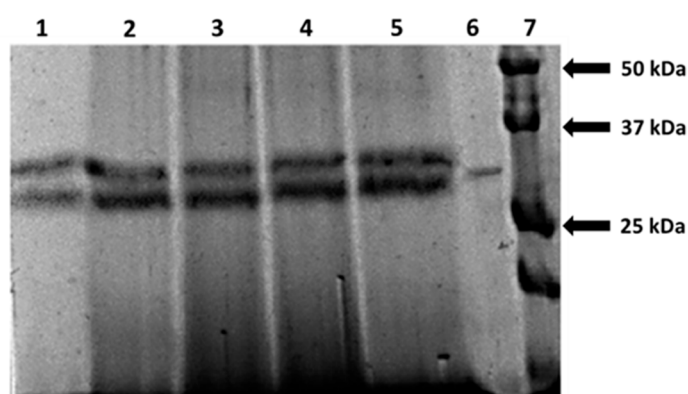

**Figure S2. B.** SDS-PAGE Cry11Aa active toxin (32- 34 kDa). Lane 1. Cry11Aa; Lane 2. Variant 8Aa; Lane 3. Variant 553; Lane 4. Variant 556; Lane 5. Variant 553-556; Lane 6. Negative control BMB171; 7) Weight marker.

**Table S1.** Oligos designed to obtain the variants 8Cry11Aa-553, 8Cry11Aa-556 and 8Cry11Aa-553/556.

| Position | ID    | Sequence                                       |
|----------|-------|------------------------------------------------|
| 553      | 3C8F  | 5'-AGAAGAGTGGTATTTATCGCAGTGGTTTGTA-3'          |
|          | 3C8R  | 5'-TACAAACCACTGCGATAAATACCACTCTTCT-3'          |
| 556      | 6C8F  | 5'-GGTATTTCTCGCAGTTGTTTGTAGTAAAAGA-3'          |
|          | 6C8R  | 5'-TCTTTTACTACAAACAACTGCGAGAAATACC-3'          |
| 553-556  | 36C8F | 5'-AGAAGAGTGGTATTTATCGCAGTTGTTTGTAG-TAAAAGA-3' |
|          | 36C8R | 5'-TCTTTTACTACAAACAACTGCGATAAATACCAC-TCTTCT-3' |
